## RESEARCH ARTICLE

# Use of a wine yeast deletion collection reveals genes that influence fermentation performance under low-nitrogen conditions

Josephine J. Peter<sup>1</sup>, Tommaso L. Watson<sup>1</sup>, Michelle E. Walker<sup>1</sup>, Jennifer M. Gardner<sup>1</sup>, Tom A. Lang<sup>1</sup>, Anthony Borneman<sup>2</sup>, Angus Forgan<sup>2</sup>, Tina Tran<sup>2,†</sup> and Vladimir Jiranek<sup>1,3,\*,‡</sup>

<sup>1</sup>Department of Wine and Food Science, School of Agriculture Food and Wine, The University of Adelaide, Waite Campus, Urrbrae, SA 5064, Australia, <sup>2</sup>The Australian Wine Research Institute, Waite Campus, Urrbrae, SA 5064, Australia and <sup>3</sup>Australian Research Council Training Centre for Innovative Wine Production, The University of Adelaide, Waite Campus, Urrbrae, SA 5064, Australia

\*Corresponding author: Department of Wine and Food Science, School of Agriculture, Food and Wine, The University of Adelaide, Urrbrae, SA 5064, Australia. Tel: +61-8-313-5561; Fax: +61-8-313-7415; E-mail: [vladimir.jiranek@adelaide.edu.au](mailto:vladimir.jiranek@adelaide.edu.au)

†Present address: AB Biotek, 1 Richardson Place, North Ryde, NSW 2113, Australia.

One sentence summary: Screening of a wine yeast deletion collection under low-nitrogen conditions.

Editor: Isak Pretorius

‡Vladimir Jiranek, <http://orcid.org/0000-0002-9775-8963>

## ABSTRACT

A deficiency of nitrogenous nutrients in grape juice can cause stuck and sluggish alcoholic fermentation, which has long been a problem in winemaking. Nitrogen requirements vary between wine yeast strains, and the ability of yeast to assimilate nitrogen depends on the nature and concentration of nitrogen present in the medium. In this study, a wine yeast gene deletion collection (1844 deletants in the haploid AWRI1631 background) was screened to identify genes whose deletion resulted in a reduction in the time taken to utilise all sugars when grown in a chemically defined grape juice medium supplemented with limited nitrogen (75 mg L<sup>-1</sup> as a free amino acid mixture). Through micro-scale and laboratory-scale fermentations, 15 deletants were identified that completed fermentation in a shorter time than the wildtype (c.a. 15%–59% time reduction). This group of genes was annotated to biological processes including protein modification, transport, metabolism and ubiquitination (*UBC13*, *MMS2*, *UBP7*, *UBI4*, *BRO1*, *TPK2*, *EAR1*, *MRP17*, *MFA2* and *MVB12*), signalling (*MFA2*) and amino acid metabolism (*AAT2*). Deletion of *MFA2*, encoding mating factor- $\alpha$ , resulted in a 55% decrease in fermentation duration. *Mfa2* $\Delta$  was chosen for further investigation to understand how this gene deletion conferred fermentation efficiency in limited nitrogen conditions.

**Keywords:** *Saccharomyces cerevisiae*; yeast deletion library; genome wide screening; limited nitrogen; *MFA2*; mating  $\alpha$ -factor

## INTRODUCTION

To complete fermentation successfully (i.e. utilisation of all fermentable sugars), yeasts require sufficient yeast assimilable nitrogen (YAN). The presence of sufficient YAN supports appropriate cell growth and metabolism (Bell and Henschke 2005; Ugliano et al. 2007). The rate at which a cell grows and maintains its metabolic activity can influence the regulation of other pathways (e.g. sugar metabolism), which in turn affects fermentation kinetics (Bely, Sablayrolles and Barre 1990; Sablayrolles et al. 1996; Alexandre and Charpentier 1998). YAN metabolism also leads to the production of various aroma and flavour compounds, which contribute to the organoleptic properties of the wine (Vilanova et al. 2007). Therefore, YAN availability is important in fermentation by significantly influencing cell growth, rate of sugar catabolism and wine flavour (Bell, Ough and Kliewer 1979; Henschke and Jiranek 1993; Ugliano et al. 2007).

Although YAN is one of the main nutrient groups needed during fermentation, it is often not present in sufficient amounts in grape must to enable yeast to utilise all sugar. The amount and composition of YAN present in the juice can vary depending on factors such as the grape variety, viticultural management practices, soil, climate and degree of ripeness (Henschke and Jiranek 1993; Alexandre and Charpentier 1998; Bell and Henschke 2005). For example, the YAN content in Australian grape juices varies between 50 and 350 mg L<sup>-1</sup> (Ugliano et al. 2007). YAN concentrations below 150 mg L<sup>-1</sup> increase the risk of stuck and sluggish fermentation as a consequence of yeast metabolism being affected (Jiranek, Langridge and Henschke 1995a; Alexandre and Charpentier 1998; Bell and Henschke 2005). Stuck and sluggish fermentations result in wine left with residual sugar, which is not desirable in certain wine styles (Bisson 1999). Moreover, unfermented sugars can support spoilage organisms (McClellan, Does and Bisson 1989) producing undesirable aromas and flavours, as well as volatile acidity (Alexandre and Charpentier 1998). The depletion of YAN in juices can also lead to the liberation of excessive H<sub>2</sub>S in wine (Jiranek, Langridge and Henschke 1995b; Ugliano et al. 2009).

In order to minimise problematic fermentations due to YAN insufficiency, it is common practice for winemakers to supplement fermentations with inorganic ammonium salts. These supplementations are often carried out empirically without determining the nitrogen requirement of the inoculated strain or the nitrogen content of the grape juice (Jiranek, Langridge and Henschke 1995a; Torrea et al. 2011). Poorly considered supplementation could result in wine with increased levels of residual nitrogen that encourage microbial instability in the bottled wine, and thus reduce quality (Jiranek, Langridge and Henschke 1995a; Bell and Henschke 2005). Also, YAN supplementation plays an important role in modulating the production of both primary metabolites and volatile compounds, which can affect wine aroma and flavour (Torrea et al. 2011) positively or negatively if not balanced or over threshold (Ugliano et al. 2007).

An alternative paradigm to supplementation is to use yeast strains that are able to efficiently utilise the YAN available in juice in order to complete fermentation. Commercial wine yeasts have different requirements or demands for YAN (Jiranek, Langridge and Henschke 1995a; Gutiérrez et al. 2012; Gutiérrez et al. 2013; Brice et al. 2014). Yeasts with lower YAN demands are less likely to undergo nitrogen (N) starvation, enabling successful completion of fermentation in YAN-deficient juices (Manginot, Roustan and Sablayrolles 1998; Gardner, Poole and Jiranek 2002). Therefore, identification of genetic determinants conferring N-efficient behaviour has great merit. Previous

work by this group utilising a transposon mutant library in both a laboratory and wine yeast background identified genes impacting N-efficiency and fermentation efficiency (Gardner et al. 2005; Zhang et al. 2018). This study builds on that work by screening a library of open reading frame deletants constructed in a wine yeast background.

Accordingly, the fermentation capabilities of a partial wine yeast deletion collection were analysed in high-throughput micro-fermentations under limited-N conditions and mutants grouped according to their performance. Those with the shortest fermentation were tested in laboratory-scale cultures to confirm their ability to complete N-limited fermentation quickly. The deleted genes of these mutants are of interest as they represent potential targets for strain improvement. Among the genes highlighted was *MFA2*, encoding mating pheromone  $\alpha$ -factor. This is the first report describing the dual function of *MFA2* in mating as well as fermentation.

## MATERIAL AND METHODS

### Strains and media

The parental prototrophic haploid strain AWRI1631 (*MATa*) was derived from a widely used commercial strain (N96; Borneman et al. 2008). A wine yeast deletion collection containing 1844 mutants was prepared in AWRI1631 by replacement of non-essential genes with the *KanMX* cassette (Wach et al. 1994) as described for a subset of these deletants (Varela et al. 2012). Strains were routinely grown on YPD medium (1% yeast extract, 2% bacto-peptone, 2% D-glucose; Guthrie and Fink 2002) with 200 mg L<sup>-1</sup> of G418 sulfate for deletant strains and with 2% agar when solid media were required for plating.

Chemically defined grape juice medium (CDGJM; McBryde et al. 2006) containing 200 g L<sup>-1</sup> sugar as equimolar amounts of glucose and fructose with 75 mg L<sup>-1</sup> of a mixture of amino acids and ammonium chloride (Henschke and Jiranek 1993) was used for micro-scale and laboratory-scale fermentations. To mimic red grape juice, 3 g L<sup>-1</sup> polyphenol extract powder (Cat: Tppr, OenoProd, Beaune, France) was also added (Walker et al. 2014).

### Micro-fermentation of the wine yeast deletion collection in CDGJM

#### Measurement of cell growth

The wine yeast deletion collection and the wildtype strain, AWRI1631, were inoculated from -80°C glycerol stocks (2  $\mu$ L) into 96-well microtiter plates (Corning Costar®, Corning, New York, USA; Cat No. CLS3596) containing 200  $\mu$ L of YPD and incubated statically for 48 h at 28°C. Cells were resuspended by agitation, and 2  $\mu$ L of the culture were inoculated into 200  $\mu$ L of CDGJM in 96-well microtiter plates and covered with clear breathable sealing film (Axygen Corning, NY, USA; AXY BF-400) to allow measurement of growth as optical density at 600 nm using a spectrophotometric plate reader (Tecan, Mannedorf, Switzerland; M200 Infinite). All liquid handling was performed using an automatic platform fitted with an 8-channel pipetting head (CAS-3800, Corbett Robotics, QLD, Australia).

#### Measurement of fermentation progress

Fermentation progress was measured using a sacrificial sampling approach as described in Liccioli et al. (2011b). In brief, four copies of the same plate were prepared by transferring 6  $\mu$ L

of overnight YPD culture into 600  $\mu\text{L}$  of CDGJM in deep 96-well plates (Axygen; Cat No. P-DW-20-C) and covered with a cloth membrane (Diversified Biotech, Dedham, MA; Cat No. BEM-1). One plate of the four copies was collected and stored at  $-20^\circ\text{C}$  at each sampling point during fermentation to enable subsequent determination of residual sugar content. This approach was used to eliminate the potential influence of multiple samplings from the same small volume fermentations. Residual glucose and fructose were quantified enzymatically as described in Boehringer-Mannheim (1989) with final volumes adjusted to 200  $\mu\text{L}$  for analysis in 96-well microtiter plates and with Megazyme (Bray, Ireland) reagents. Liquid handling during plate preparation and enzymatic analysis was performed robotically.

#### Evaluation of strains in laboratory-scale fermentations

Flask fermentations (100 mL) in this study were conducted in CDGJM using either an automated 96-flask fermentation platform or 250 mL Erlenmeyer flasks fitted with an airlock (Walker et al. 2003). The automated fermentation platform built on a Tecan Freedom EVO consisted of four 24-position water jacketed carriers, to maintain temperature with magnetic stirrers to continuously agitate the fermentations. Each flask was comprised of a customised 100 mL Schott bottle with a fermentation lock and septum-sealed sampling port. The liquid handling arm of the Freedom EVO collected samples ( $\sim 1$  mL) at regular intervals for off-line analysis. Two hundred microliter from each sample was used to measure growth (see above) and the remaining samples were stored at  $-20^\circ\text{C}$  prior to the enzymatic determination of residual sugar.

#### Calculation of area under the curve and fermentation duration to determine fermentation performance

Fermentations were considered complete and total fermentation duration determined when residual sugar content was less than  $2.0\text{ g L}^{-1}$ . The residual sugar values measured at each sampling point were used to plot fermentation curves for each mutant from the 100-mL fermentations. The area under the curve (AUC) of each profile was then calculated using the composite trapezoid rule using GraphPad Prism 6 (GraphPad software INC., La Jolla, CA, USA) as described by Liccioli, Chambers and Jiranek (2011a). Where the AUC values of the deletants were less than that of the wildtype, the deletants were considered to have an improved fermentation efficiency.

#### Statistical analysis

A two-way analysis of variance (ANOVA) (Dunnett's multiple comparison test) was performed to determine the statistical significance between the fermentation performance of the individual mutants and the wildtype during fermentation. A scatter plot representing correlation between residual sugar and growth was performed using Pearson  $r$  correlation. Observed differences in the expression level of gene(s) in the wildtype and deletants were statistically tested using a two-way ANOVA (Bonferroni's multiple comparisons test). All of these statistical analyses were performed using GraphPad Prism 6 (GraphPad software INC., La Jolla, CA, USA).

#### Primers used in this study

The primers and corresponding sequences used in this study are shown in Table 1. Primers were sourced from Sigma Aldrich (Australia).

#### Confirmation of identity of individual deletants

The identity of individual deletants was authenticated by amplification of the deletion cassette using gene-specific primers (Table 1) and comparison of the DNA sequence to the reference genome of S288c using WU-BLAST2 (<http://www.yeastgenome.org/blast-sgd>). For deletants incorrectly labelled, the barcode region of the *KanMX* deletion cassette was amplified using primers U1 and D1 (Table 1). The tool FASTA barcodes (<http://www.ttuhsu.edu/som/cbb/FASTAbarcodes/>) was used to identify the query sequence to the up and down tags of the deletion library (McMahon et al. 2011).

#### Construction of an MFA1 deletion in AWRI1631

An MFA1 deletion strain was constructed in the haploid wine strain AWRI1631 using a PCR-based deletion strategy (Baudin et al. 1993; Wach et al. 1994). The *mfa1 $\Delta$ ::KanMX* deletion cassette was sourced from the MFA1 deletion clone from the prototrophic BY4741 collection (Mulleder et al. 2012). The cassette was PCR amplified using VELOCITY DNA polymerase (Biolone, London, UK; 21098) with gene-specific primers A and D (Table 1) according to the manufacturer's instructions. The identity of the PCR product was confirmed by sequencing and validated products were then transformed into AWRI1631 using the lithium acetate method (Gietz and Schiestl 2007). Transformants were selected on YPD plates containing G418 sulfate ( $200\text{ mg L}^{-1}$ ), and the deletions were confirmed by PCR amplification and sequencing.

#### Quantitative PCR for gene expression studies

To study gene expression, a quantitative PCR (qPCR) experiment was conducted following the MIQE guidelines (Bustin et al. 2010; Taylor and Mrkusich 2014). Samples of the culture harvested during fermentation at similar residual sugar concentrations (approximately 128, 83, 35 and  $10\text{ g L}^{-1}$ ) were used to compare transcript abundance between strains. Cells were collected by centrifugation, and resuspended in TRIzol® Reagent (Invitrogen, Carlsbad, CA, USA; 15596026) followed by snap freezing in liquid N and storage at  $-80^\circ\text{C}$ . Total RNA was extracted using Zymo (Irvine, CA, USA) Research kits (Direct-zol RNA MiniPrep R2050) as per the manufacturer's instructions. RNA purity and integrity were estimated from  $\text{OD}_{260}/\text{OD}_{280}$  (Tecan M200 Infinite) and gel electrophoresis. cDNA was synthesised from the total RNA (BioRad, Hercules, CA, USA, iScript kit; 170-8897) and any contaminating DNA removed with an Ambion TURBO DNasefree kit (ThermoFischer, Waltham, MA, USA; AM1907). Relative quantification of the transcripts was performed on a Biorad CFX-96 Real Time PCR system with Ssofast Evagreen Supermix (BioRad; 172-5203) with primers as listed in Table 1. The amplification cycle included an initial denaturation at  $95^\circ\text{C}$  for 30 s followed by 40 cycles at  $95^\circ\text{C}$  for 5 s and  $60^\circ\text{C}$  for 5 s. A sample maximisation strategy was used with all six biological replicates being amplified in duplicate. At the end of each run, a melt curve was prepared for all samples from  $65^\circ\text{C}$  to  $95^\circ\text{C}$ . Transcript abundance of the target genes was normalised with abundance of reference genes (*TAF10*, *ALG9*; Teste et al. 2009) in the same sample. The stability of the housekeeping genes was determined using qbase + software (Vandesompele et al. 2002) and primer efficiency was determined by running a standard curve using a serially diluted cDNA sample. The mean fold change of expression for given genes per sample for different time points was determined using a relative quantification method (Schmittgen

**Table 1.** Primers used in this study.

| Gene name          | Forward primer sequence (5'-3') | Reverse primer sequence (5'-3')  |
|--------------------|---------------------------------|----------------------------------|
| TDA7 <sup>a</sup>  | TAATGCGATTATTTTCGCTTGAAAT       | GTATGTTAAAATGCCTTCCAGATTG        |
| UBP7 <sup>a</sup>  | GCATCCGGTAATACTAACAAGAGAA       | AATAATAATGGTGGTAATGGCAATG        |
| AIM26 <sup>a</sup> | GCTGGTATTGACAGGTAACATATGCT      | GAATCCAGTTCGTTCTCAAACCTTAG       |
| MFA2 <sup>a</sup>  | TGATAGTTTCCTTTTCCGTTAAAGTG      | TGGCTCAAACCTTTTTCACCTTTTAC       |
| UBI4 <sup>a</sup>  | AATAATCCTGGATAAAGCAATTTTCG      | CTTTTCCCTTTTGGTAGTCACAATA        |
| MKT1 <sup>a</sup>  | ATTAAGAACAAGACGAAAAATGGTG       | AACTTCAATCTATCCAGTAACGGTG        |
| MMS2 <sup>a</sup>  | CACCCTATTGCTCATTTTGTACTG        | TATTTATTATTGGCTTGGACTGGAG        |
| MRP17 <sup>a</sup> | ATACCCACTCAAACAACTCATTGT        | CTTAGTCAGGATTGTCGTTTAGCAT        |
| MVB12 <sup>a</sup> | TGATTTTCATGTATTTTGGTTTCAGA      | GAAATTCAGCATGGAGAAGAAGTAA        |
| AAT2 <sup>a</sup>  | ATACACAATTACTCCAGTAGCTGCC       | TATCCTTTTATGTTTCATGGGAGTTGT      |
| BRO1 <sup>a</sup>  | GCCTTCCCTTTTCTTGATGTATATT       | ACAGTCTAGCACGAAAAAGAAGAGA        |
| TPK2 <sup>a</sup>  | TACAATTCTGGCCTTCTTACCTAAA       | TAATTTTTCAGTACTGAGATCATGAGA      |
| INA1 <sup>a</sup>  | CTCAGTACTCGTTTAGCTTGAATCC       | TGGGCACTTACTCATACTCAAATA         |
| EAR1 <sup>a</sup>  | TACAGGCTTTAAGAACCTTGTCTTA       | TCATACGTTCTTCTGTGACACATT         |
| MFA1 <sup>a</sup>  | GCCCATACCTTTATCTTTGTTCTT        | AAGAAACAATGAAGCAAGATAAGGA        |
| MFA1 <sup>c</sup>  | ATGCAACCATCTACCGGTAC            | CTAAGCAATAACACATGCTGGG           |
| MFA2 <sup>c</sup>  | GATCACCACTGCTTCCACAC            | TTAAGCGATAACACAGGCGG             |
| TAF10 <sup>d</sup> | ATATTCAGGATCAGGTCTCCGTAGC       | GTAGTCTTCTCATTCTGTTGATGTTGTTG    |
| ALG9 <sup>d</sup>  | CACGGATAGTGGCTTTGGTGAACAATTAC   | TATGATTATCTGGCAGCAGGAAAGAACTTGGG |
| U1 <sup>b</sup>    | GATGTCCACGAGGTCTCT              |                                  |
| D1 <sup>b</sup>    |                                 | CGGTGTCGGTCTCGTAG                |
| KanB <sup>b</sup>  | CTGCAGCGAGGAGCCGTAAT            |                                  |
| KanC <sup>b</sup>  |                                 | TGATTTTGTATGACGAGCGTAAT          |

<sup>a</sup>Deletion cassette amplification.

<sup>b</sup>Identification of clones that were incorrectly labelled in the wine yeast library.

<sup>a,b</sup>Primer sequences were from Saccharomyces Genome Deletion Project ([http://www.sequence.stanford.edu/group/yeast\\_deletion\\_project/Deletion\\_primers\\_PCR\\_sizes.txt](http://www.sequence.stanford.edu/group/yeast_deletion_project/Deletion_primers_PCR_sizes.txt)).

<sup>c</sup>Primers for qPCR target genes were designed using Primer3 software (<http://simgene.com/Primer3>).

<sup>d</sup>Primers for qPCR reference genes were adapted from (Teste et al. 2009).

and Livak 2008) using the qbase + software (Vandesompele et al. 2002), Excel (Microsoft Office 2013) and GraphPad Prism (GraphPad Prism 6—GraphPad software INC., La Jolla, CA, USA).

## RESULTS

### Construction of a wine yeast deletion library

To ensure that the most industrially relevant genetic background was used in this study, a wine yeast deletion library was constructed in the haploid wine yeast derivative AWRI1631 (Borneman et al. 2008). Using the approach reported previously (Varela et al. 2012), a total of 1844 mutants were constructed (Table 1, Supporting Information). All the deletants were checked by PCR amplification and sequencing of the deletion cassette.

### High-throughput screening (micro-fermentation) of the wine yeast deletion collection

In order to identify genes that influence fermentation duration when only supplied with minimal N (75 mg L<sup>-1</sup>), the sugar utilisation profile of clones from this wine yeast deletion collection was compared to that of the wildtype strain, AWRI1631, in a high-throughput micro-fermentation screening in CDGJM (Fig. 1). To ensure supplied nitrogen would protract fermentation, preliminary experiments were also undertaken with the addition of sufficient N (450 mg L<sup>-1</sup>). The wildtype strain was able to utilise all available sugar in ~60 h in comparison to ~200 h when only minimal N is available (data not shown). Additional fermentation wells containing the wildtype were sampled at a higher frequency to accurately determine the most ap-

propriate sampling points (A–D) for the deletants (Fig. 2A). Initially, the wildtype consumed sugars slowly (43 g L<sup>-1</sup> by 96 h); however, fermentation became more vigorous after 96 h. Using this information, residual sugars were measured for the 1844 deletants at time points B (121 h) and C (146 h). The extent of sugar catabolism by the wine yeast deletants was highly variable (Fig. 2B), when the concentration of residual sugars for the wildtype was 42 ± 8 g L<sup>-1</sup> (time point C). Given this range, the deletants were classified into three groups: 1040 with residual sugar around that of the wildtype (30–60 g L<sup>-1</sup>), 282 with more residual sugar (>60 g L<sup>-1</sup>) than the wildtype and 522 with markedly less residual sugar (<30 g L<sup>-1</sup>) than the wildtype group (Table 2, Supporting Information). Growth was also monitored for the wildtype and the deletants during the early stages of micro-fermentation (Fig. 2A; Table 1, Supporting Information). The wildtype reached stationary phase at 113 h with an optical density of 1.77. Therefore, using optical density at 113 h and residual sugars at 146 h (time point C), a correlation was plotted to identify whether the fermentation abilities of the deletants were dependent on growth (Fig. 3). A weak negative correlation was observed, emphasising a small effect of growth on fermentation progression (i.e. increase in growth of the deletants leading to a decrease in residual sugar). Further analysis of the 522 deletants, which completed fermentation in a shorter time than the wildtype, identified that the majority (408 i.e. 78%) of the deletants had higher optical density than the wildtype.

Based on the results of this screening exercise, 92 candidates with the greatest reduction in fermentation duration and no growth defects were chosen for further evaluation (Screen II, Table 3, Supporting Information). These candidates were selected as they were observed to utilise significantly more sugar

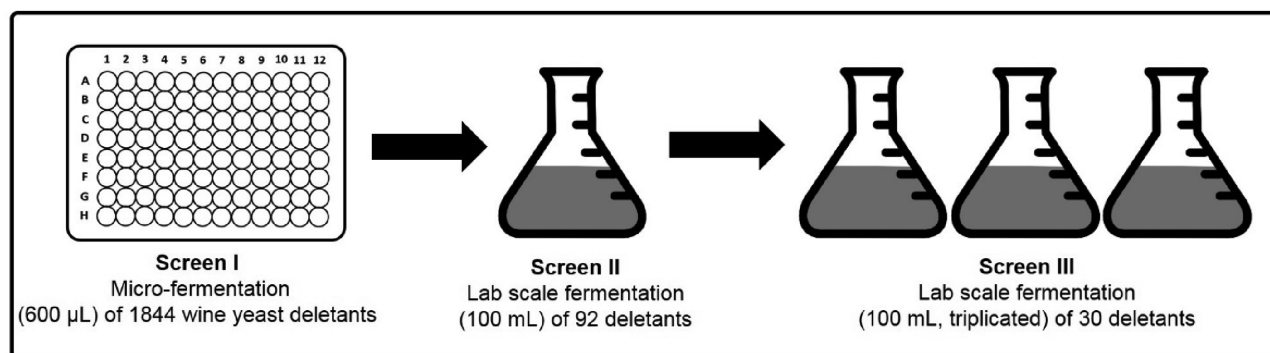

Figure 1. Schematic representation of the screening of the wine yeast deletion library for fermentation performance in a CDGJM with limited nitrogen ( $75 \text{ mg N L}^{-1}$ ).

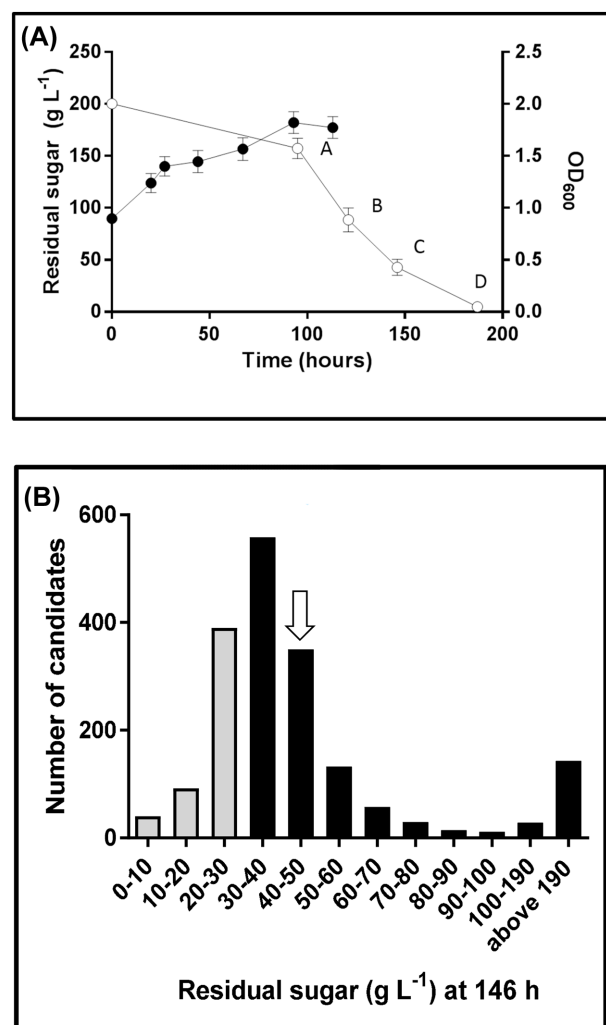

Figure 2. (A) Fermentation performance of AWRI1631 during micro-fermentation. Sugar utilisation (open symbols) at four time points: A (95 h), B (121 h), C (146 h) and D (187 h). Growth as estimated by optical density at 600 nm (solid symbols). Sixteen replicates were analysed. (B) Histogram representing the distribution of deletion mutants (number) based on the residual sugar content at time point C (146 h). The arrow indicates the residual sugar concentration range of the wildtype, AWRI1631 ( $42 \pm 8 \text{ g L}^{-1}$ ) at time point C. Candidates for further analysis were chosen from the groups with grey shaded bars.

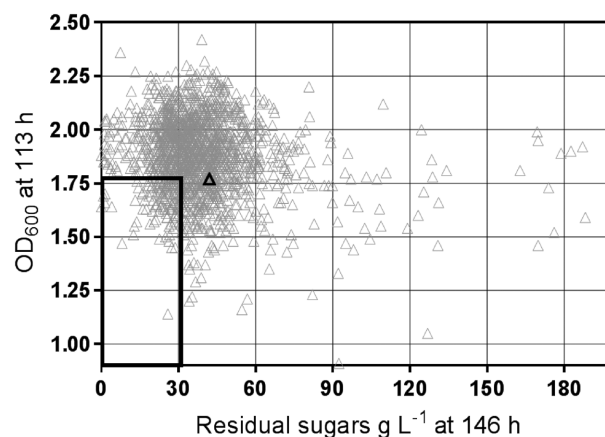

Figure 3. Scatter plot of the residual sugar (at time point C, 146 h) and growth ( $\text{OD}_{600}$  at 113 h) of the deletion mutants (grey) and the wildtype (black) during micro-fermentation. Deletants (114) exhibiting shorter fermentation duration and decreased growth in comparison to the wildtype are highlighted in a bold box. Correlation coefficient ( $r$ ) =  $-0.1616$ .

than the wildtype, having less than 48 and  $26 \text{ g L}^{-1}$  of residual sugar at time points B and C, respectively—i.e. approximately half of that of the wildtype ( $88$  and  $42 \text{ g L}^{-1}$  of residual sugar at time point B and C, respectively). Of the possible 522 candidates, an arbitrary total of 92 of the most fermentation efficient deletants was chosen since this number (plus controls) could be accommodated in the 96-position fermentation platform.

### Confirmation of deletant fermentation performance in laboratory-scale fermentations

The fermentation performance of the 92 shortlisted deletants was confirmed in laboratory-scale (100 mL), non-replicated fermentations (screen II) since this format allowed greater control of experimental conditions and better representation of an anaerobic, wine-like fermentation (Walker et al. 2014). Results of this experiment highlighted 48 deletants that completed fermentation in less time than the wildtype (Fig. 4A), with 30 utilising all sugar within 131–205 h compared to 229 h for the wildtype. As well as total fermentation time, the AUC of fermentation curves of individual deletants was also used for a more holistic view of the pattern of sugar utilisation by which deletants were ranked (Liccioli, Chambers and Jiranek 2011a). AUC values calculated for the 30 strains were 7185–9516 (i.e. 72%–95% of the wildtype at 9999; Table 4, Supporting Information). These 30 candidates were further assessed in a third screen

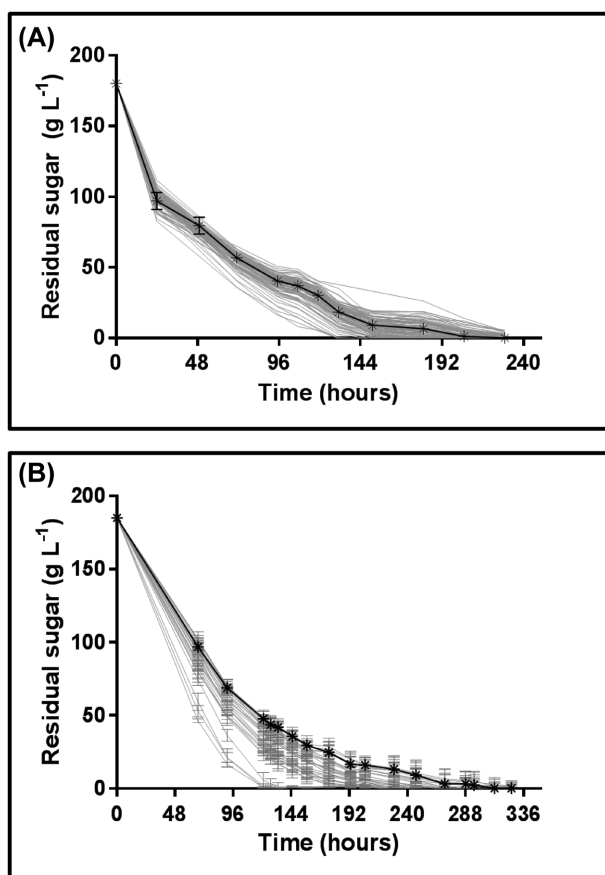

Figure 4. Sugar utilisation of the wildtype (AWRI1631, black line) compared to the shortlisted 92 deletants (grey lines) over time. Fermentation was conducted in 100 mL of CDGJM with 75 mg N L<sup>-1</sup> at 28°C on a robotic sampling platform. (A) Screen II of the shortlisted 92 yeast deletants (single cultures) compared with the wildtype (four replicates). (B) Screen III of the selected 30 candidates in triplicate, along with the wildtype strain (six replicates). Standard deviation of the mean is represented as error bars.

conducted in triplicate (Fig. 4B). Fifteen of these deletants utilised all sugars in significantly less time than the wildtype (Table 2). *Tda7Δ* and *aim26Δ* were the most rapid deletants, completing fermentation in 121 h, which was 172 h ahead of the wildtype (293 h). Closely following were *ubp7Δ* and then *mfa2Δ* (Table 2). The remaining 11 deletants exhibited fermentation durations ranging from 63% to 85% of the wildtype. The AUC for individual deletants representing sugar utilisation over time was calculated as being 54%–85% of AWRI 1631, with *tda7Δ* (AUC = 8911) being the most efficient and *ear1Δ* (AUC = 14073) being the least efficient compared to the wildtype (AUC = 16399; Table 2).

### Characterisation of the deletants *mfa1Δ* and *mfa2Δ*

To date, *MFA2* has only been annotated to mating and cell-type regulation (Michaelis and Herskowitz 1988; Johnson 1995; Galgoczy et al. 2004). Our results of improved fermentation performance under N-limited conditions for *mfa2Δ* allude to a dual function of this gene. In order to explore the link between efficient fermentation and the yeast mating factor, the function of the two genes encoding mating a-factor, *MFA2* and *MFA1*, were further studied. The sugar utilisation and growth profile of *mfa1Δ* was similar to the wildtype (AWRI1631), whilst growth

and fermentation duration of *mfa2Δ* were reduced (Fig. 5). The expression of *MFA1* and *MFA2* during fermentation was also examined. RNA was extracted from cultures of mutant (AWRI1631 *mfa2Δ*) and parental (AWRI1631) strains when the sugar content was approximately 128, 83, 35 and 10 g L<sup>-1</sup> in each culture. Differential expression of *MFA1* and *MFA2* was observed in the wildtype, with *MFA2* being expressed to a greater extent (~1.93-fold NREL) compared to *MFA1* (~0.17-fold NREL) at the first time point (Fig. 6A and B). The expression of both genes markedly declined at 83 and 35 g L<sup>-1</sup> of residual sugar (corresponding to 58.5% and 82.5% sugar consumption, respectively). In the case of *MFA2*, expression recovered in the wildtype in the final sample (95% of sugar consumed; Fig. 6B). The absence of *MFA2* transcript in the AWRI1631 *mfa2Δ* strain confirmed the deletion of the *MFA2* gene (Fig. 6B). Interestingly, expression of *MFA1* was upregulated by ~6- to 7-fold in the *MFA2* deletant at the initial sampling point (128 g L<sup>-1</sup>). Although *MFA1* expression declined subsequently, it remained ~4-fold higher than in the wildtype (Fig. 6A).

## DISCUSSION

Yeasts differ in fermentative capabilities in N-deficient must, which is dependent upon their demand for nitrogen (N) to maintain glycolytic flux—the genetic basis of which is the focus of recent research (Brice et al. 2013, 2014; Tesnière, Brice and Blondin 2015). In order to generate N-efficient strains, it is important to identify genes and processes that allow the yeast to perform well in low-N juices. Gene deletions provide a paradigm to better understand the mechanisms behind the improved fermentation phenotype exhibited by these strains. Although there are several strategies that are now available for strain improvement, whole genome investigations using collections of yeast mutants with single defined gene deletions (Winzeler et al. 1999; Giaever et al. 2002) provide opportunities to readily study gene functionality, and so identify targets for strain improvement (Donalies et al. 2008). Some studies have successfully used deletion collections in auxotrophic laboratory yeast backgrounds to investigate growth phenotypes in response to exposure to single stress factors associated with fermentation. Examples include the identification of genes essential for tolerance to ethanol and other alcohols (Fujita et al. 2006; van Voorst et al. 2006; Teixeira et al. 2009), high pressure and low temperature (Abe and Minegishi 2008), acetic acid (Mira et al. 2010), oxidative and chemical stress (Tucker and Fields 2004), high glucose (Teixeira et al. 2010), anaerobic growth (Reiner et al. 2006) and low temperature (Salvadó et al. 2016). Most recently, this approach has been used by this group to define the Fermentome, genes essential to allow the successful completion of fermentation under the multistress conditions of a high-sugar, juice-like medium (Walker et al. 2014). Alternatively, genes important to the response of yeast to stress have been identified through transcriptional analyses following exposure to stresses such as N limitation (Backhus et al. 2001; Rossignol et al. 2003; Mendes-Ferreira et al. 2007a,b; Contreras et al. 2012; Brice et al. 2013; Barbosa et al. 2015). Research in a wine yeast background to identify genes related to N-efficiency in wine-like fermentations has been limited to the screening of random collections of transposon mutants of non-essential genes (Gardner et al. 2005; Zhang et al. 2018). The present study sought to fill this knowledge gap.

The need to supply sufficient N (both in amount and specific amino acid composition) to meet the auxotrophic requirements of laboratory strains used in previous studies has meant

Table 2. Fermentation performance of fermentation efficient deletants.

| Deleted gene       | Gene function                            | FD (h)<br>(FD ± SD) | FD % of<br>wildtype | AUC<br>(AUC ± SD) | AUC % of wildtype<br>(AUC % ± SD) |
|--------------------|------------------------------------------|---------------------|---------------------|-------------------|-----------------------------------|
| TDA7 <sup>a</sup>  | Topoisomerase I Damage Affected          | 121 ± 0             | 41 ± 0              | 8911 ± 114        | 54 ± 0                            |
| UBP7 <sup>a</sup>  | UBiquitin-specific Protease              | 123 ± 3             | 42 ± 1              | 9332 ± 275        | 57 ± 1                            |
| AIM26 <sup>a</sup> | Altered Inheritance rate of Mitochondria | 121 ± 0             | 41 ± 0              | 9602 ± 482        | 58 ± 2                            |
| MFA2 <sup>a</sup>  | Mating Factor A                          | 131 ± 12            | 45 ± 4              | 10 825 ± 431      | 66 ± 2                            |
| UBC13 <sup>a</sup> | Ubiquitin-conjugating                    | 185 ± 17            | 63 ± 6              | 12 205 ± 645      | 74 ± 3                            |
| UBI4 <sup>a</sup>  | Ubiquitin                                | 193 ± 0             | 66 ± 0              | 12 225 ± 306      | 74 ± 1                            |
| MMS2 <sup>b</sup>  | Methyl MethaneSulfonate sensitivity      | 209 ± 18            | 71 ± 6              | 12 475 ± 720      | 76 ± 4                            |
| MRP17 <sup>a</sup> | Mitochondrial Ribosomal Protein          | 201 ± 7             | 69 ± 2              | 12 643 ± 85       | 77 ± 1                            |
| MKT1 <sup>a</sup>  | Maintenance of K2 Killer Toxin           | 191 ± 15            | 65 ± 5              | 12 712 ± 360      | 77 ± 2                            |
| MVB12 <sup>a</sup> | MVB sorting factor of 12 kilodaltons     | 193 ± 0             | 66 ± 0              | 13 239 ± 211      | 81 ± 1                            |
| AAT2 <sup>b</sup>  | Aspartate AminoTransferase               | 215 ± 28            | 73 ± 10             | 13 273 ± 986      | 81 ± 6                            |
| BRO1 <sup>b</sup>  | BCK1-like Resistance to Osmotic shock    | 227 ± 21            | 78 ± 7              | 13 387 ± 699      | 81 ± 4                            |
| INA1 <sup>c</sup>  | Indicator of Abscission                  | 225 ± 48            | 77 ± 16             | 13 567 ± 1375     | 82 ± 8                            |
| TPK2 <sup>a</sup>  | Takashi's Protein Kinase                 | 201 ± 7             | 69 ± 2              | 13 593 ± 184      | 83 ± 1                            |
| EAR1 <sup>d</sup>  | Endosomal Adaptor of Rsp5p               | 249 ± 38            | 85 ± 13             | 14 073 ± 269      | 85 ± 6                            |
| wildtype AWRI1631  |                                          | 293 ± 21            | 100                 | 16 399 ± 752      | 100                               |

Fermentation performance was calculated as AUC and FD (fermentation duration) of the 15 shortlisted gene deletants (from Screen III) and percentage difference in AUC and FD of the deletants in comparison to the parent, AWRI1631 (i.e. AUC % = (mutant AUC/parent AUC) × 100 and FD % = (mutant FD/parent FD) × 100). Fermentation duration corresponds to the time (h) by which residual sugar was <2 g L<sup>-1</sup>. Values represent the average of FD/AUC ± SD. Deletants significantly different in fermentation completion when compared to the parent are represented by <sup>a</sup>P < 0.0001; <sup>b</sup>P < 0.001; <sup>c</sup>P < 0.01; <sup>d</sup>P < 0.1 (two-way ANOVA).

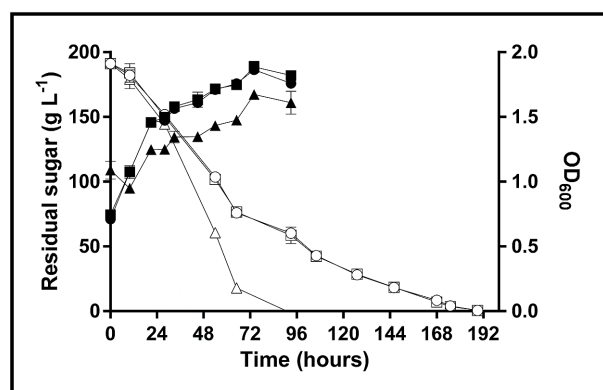

Figure 5. Fermentation performance of *mfa1Δ*, *mfa2Δ* and the wildtype AWRI1631. Fermentations (100 mL) were conducted in triplicate in CDGJM with 75 mg N L<sup>-1</sup>. Data points represent the average value ± standard deviation. Sugar utilisation over time of the individuals (open symbols). Growth as estimated by optical density at 600 nm of the individuals (solid symbols). Circle; AWRI1631, square; AWRI1631 *mfa1Δ* and triangle; AWRI1631 *mfa2Δ*.

that investigations related to N efficiency were limited to high N content (Walker et al. 2014). Several studies have shown that supplementation can affect metabolism through the blockage of pathways, or by combinatorially influencing metabolic networks, thereby making quantitative comparisons of growth and physiological studies difficult (Pronk 2002; Mulleder et al. 2012). The recent availability of prototrophic libraries in laboratory yeast (Mulleder et al. 2012) and wine yeast (Varela et al. 2012) has made it possible to conduct studies under limited-N conditions, overcoming previous shortcomings.

In this study, a prototrophic wine yeast deletion library (Varela et al. 2012) was used to identify genes influencing fermentation in a wine-like limited N medium. Based on the sugar utilisation profile of the wildtype, preliminary screening via micro-fermentations (Table 1, Supporting Information) of the wine yeast deletion collection allowed mutants to be segregated

into groups based on the extent of sugar utilisation. Fermentation by 282 of the mutants (15%, Fig. 2B; Table 2, Supporting Information) was protracted indicating that these genes were essential for the timely completion of fermentation. Walker et al. (2014) used the deletion library in the auxotrophic laboratory strain BY4743 to identify 93 genes (i.e. the fermentome) essential for fermentation in CDGJM under high N (450 mg N L<sup>-1</sup>) and high-sugar (200 g L<sup>-1</sup>) conditions. Interestingly, despite differences in the experimental conditions of these studies (i.e. N availability and strain background), our list of 282 protracted deletants included 15 of the fermentome genes (Table 3) identified by Walker et al. (2014), underscoring the universal importance of these. A further 14 deletants of fermentome genes, however, had no effect in the present study (i.e. in the AWRI1631 background), since they were not protracted compared to the wildtype. Further work to explore the influence of strain background and growth conditions will help resolve such apparent differences. More importantly, the wine yeast deletion library needs to be expanded to a complete collection from the current 1844 deletants or at least the remaining 64 fermentation essential genes identified by Walker et al. (2014) in order to assess their essentiality in the conditions of the present study.

Twenty eight percent of the wine yeast deletion library mutants (522 deletants) completed fermentation in a shorter time, alluding to the function of these genes negatively influencing fermentation progress. Whether these genes are directly related to nitrogen metabolism or instead are general regulators of fermentation is worthy of future study. Of these, 114 deletants were capable of enabling shorter fermentation time in spite of exhibiting decreased growth. In general, fermentation rate has been reported to correlate with biomass (Varela, Pizarro and Agosin 2004), further evaluation of this group of genes may reveal exceptions. However, these 522 genes are potential targets for guided strain improvement and thus were assessed in greater detail. A shortlist of the best performing 92 strains (<48 and <26 g L<sup>-1</sup> of sugar at time point B and C, respectively—i.e. ~50% of that of the wildtype) were chosen for further evaluation in 100 mL fermentations. Fifteen strains completed

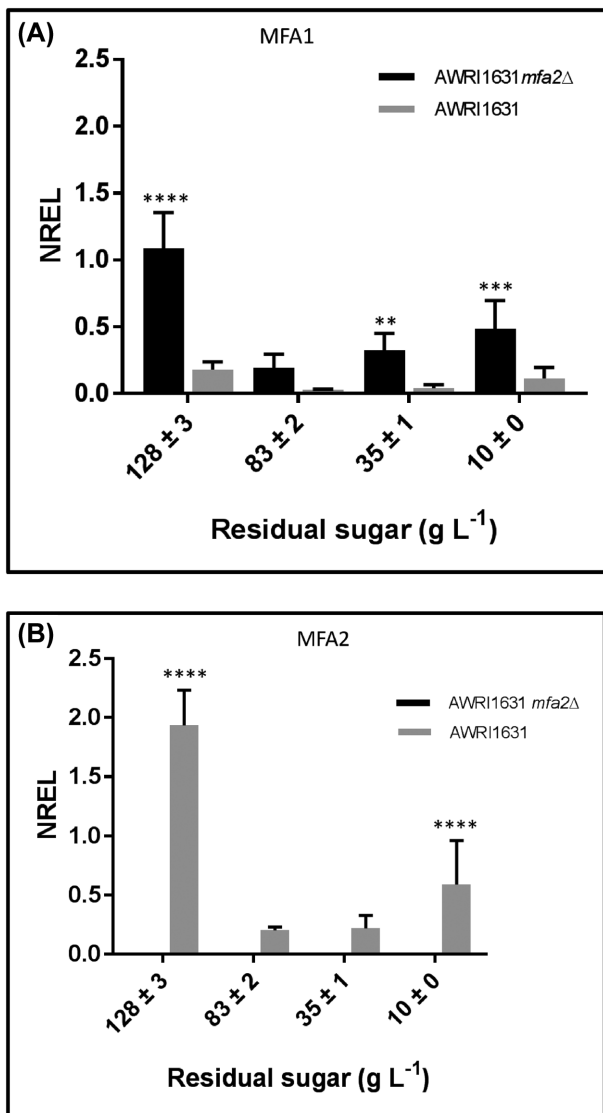

Figure 6. Expression of MFA1 (A) and MFA2 (B) in AWRI1631 and AWRI1631 *mfa2*Δ strains. Normalised relative expression level (NREL) is shown at four selected residual sugar levels (g L<sup>-1</sup>). Two-way ANOVA was used to determine the significant differences in expression levels between *mfa2*Δ and the wildtype. Significant difference is indicated as \*\**P* < 0.01; \*\*\**P* < 0.001; \*\*\*\**P* < 0.0001.

fermentation in between 41% and 69% of the time taken by the parent (Table 2). Gene Ontology (GO) analysis (Table 5, Supporting Information) revealed that 11 out of these 15 genes were over-represented for the GO terms related to different stages of ubiquitination and protein modification/turnover or metabolic processes: protein polyubiquitination (*UBI4*, *UBC13* and *MMS2*), protein deubiquitination (*UBP7*, *UBI4* and *BRO1*), protein modification by small protein conjugation (*UBP7*, *UBI4*, *BRO1*, *MMS2* and *UBC13*), post-translational protein modification (*UBP7*, *TPK2*, *UBI4*, *BRO1*, *MMS2* and *UBC13*) protein metabolic process (*UBP7*, *TPK2*, *UBI4*, *BRO1*, *MFA2*, *MMS2*, *MKT1*, *EAR1*, *UBC13* and *MRP17*) and endosomal transport (*MVB12*, *EAR1* and *BRO1*). The remaining four genes include *AAT2* (involved in aspartate aminotransferase in nitrogen metabolism) and three with unknown function, *INA1*, *TDA7* and *AIM26*.

Ubiquitination is a protein degradation process that is required in many cellular processes such as the cell cycle,

endocytosis and stress response (Hershko 1997; Staub and Rotin 2006). In a study of the stress response of yeast under sake brewing conditions, 235 genes related to stress response or ethanol fermentation were deleted and investigated for their impact on ethanol production (Wu et al. 2009). Amongst the 235 genes were *UBI4*, *UBP7*, *UBC13* and *TPK2*, which have also been identified in our study. Wu and co-workers (2009) demonstrated that deletion of ubiquitin-related genes, such as *UBI4* and *UBC13*, increased fermentation abilities producing significantly more ethanol than the parental strain. Furthermore, enhanced fermentation abilities of *ubi4*Δ were confirmed in a number of laboratory yeast strain backgrounds (Wu et al. 2009).

An important group of proteins regulated by ubiquitination are plasma membrane proteins, in particular, amino acid permeases. Ubiquitination of these initiates endocytosis and the eventual degradation of the ubiquitin-bound protein in the vacuole/lysosome via the multivesicular body (MVB) pathway (Hicke 2001). Genes such as *BRO1* and *EAR1* (in combination with *SSH4*) play a role in the regulation of Gap1p (general amino acid permease) degradation by ubiquitination in the presence of ammonium (Nikko, Marini and Andre 2003; Leon, Erpapazoglou and Haguenaue-Tsapis 2008). However, deletion of *BRO1* (Nikko, Marini and Andre 2003), *MVB12* (Oestreich et al. 2007) or *EAR1* (in combination with *ssh4*Δ; Leon, Erpapazoglou and Haguenaue-Tsapis 2008) have been shown to disrupt this pathway thereby interfering with the degradation process. Interestingly, *ear1*Δ (in combination with *ssh4*Δ) results in the localisation of Gap1p to the vacuolar membrane rather than the vacuolar lumen, where it would otherwise be degraded (Leon, Erpapazoglou and Haguenaue-Tsapis 2008). Furthermore, *bro1*Δ results in the recycling of Gap1p to the cell membrane without ubiquitination in the presence of ammonium (Nikko, Marini and Andre 2003), essentially desensitising GAP1 to nitrogen catabolite repression at the protein level. It is possible to consider that the lack of regulation of amino acid permeases by the MVB pathway may play a role in successful low-N fermentation. However, it is not known how the gene deletions in this study affect the degradation of other amino acid permeases or amino acid catabolic enzymes, which could also play a role in the observed enhanced fermentation performance.

*MFA2* was further investigated to understand how deletion of this mating gene positively affected fermentation. To date, *MFA2* has only been annotated to mating and cell-type regulation (Michaelis and Herskowitz 1988; Johnson 1995; Galgoczy et al. 2004). *MFA2*, together with *MFA1*, considered functionally redundant (a-factor) in a MATa cell (Michaelis and Herskowitz 1988). Both *MFA1* and *MFA2* produce a precursor (36 and 38 amino acids, respectively), which undergoes several modification steps involving different genes before the mature a-factor molecule is transported outside the cell through the ABC transporter *STE6* (review by Michaelis and Barrowman 2012). We hypothesise that mating pheromone production and processing is an energy-consuming process. Therefore, in a pure culture of a haploid heterothallic strain, such as within this study where no mating or switching of mating types occurs, the ability to downregulate synthesis/processing of mating factor-a may lead to a metabolic efficiency that benefits fermentation. This finding is in keeping with the finding that deletants of *MFA2* are haploproficient in either carbon- or nitrogen-limited media (Delneri et al. 2008). Deletion of *MFA2* also results in lower biomass (Fig. 5) suggesting that fermentation capability on a per cell basis far exceeds that of the parent. This may be related to metabolic efficiencies due to modification of the mating pheromone a-factor pathway. Given



**Table 3.** List of genes essential in timely completion of fermentation.

| ORF     | Gene name | Gene function description                                       |
|---------|-----------|-----------------------------------------------------------------|
| YEL051W | VMA8      | Subunit D of the V1 peripheral membrane domain of V-ATPase      |
| YHL020C | OPI1      | Transcriptional regulator of a variety of genes                 |
| YKR007W | MEH1      | Component of the EGO and GSE complexes                          |
| YFR053C | HXK1      | Hexokinase isoenzyme 1                                          |
| YDR247W | VHS1      | Cytoplasmic serine/threonine protein kinase                     |
| YGR063C | SPT4      | Spt4p/5p (DSIF) transcription elongation factor complex subunit |
| YJR033C | RAV1      | Subunit of RAVE complex (Rav1p, Rav2p, Skp1p)                   |
| YLL007C | LMO1      | Homolog of mammalian ELMO (Engulfment and cell MOTility)        |
| YMR263W | SAP30     | Component of Rpd3L histone deacetylase complex                  |
| YNL076W | MKS1      | Pleiotropic negative transcriptional regulator                  |
| YOR209C | NPT1      | Nicotinate phosphoribosyltransferase                            |
| YOR221C | MCT1      | Predicted malonyl-CoA:ACP transferase                           |
| YOR265W | RBL2      | Protein involved in microtubule morphogenesis                   |
| YPR036W | VMA13     | Vacuolar Membrane Atpase                                        |
| YPR074C | TKL1      | TransKetoLase                                                   |

ORF, open reading frame.

**Table 4.** List of genes interacting with MFA2 involved in carbohydrate metabolism/transport or storage.

| Type of interaction | Gene  | Gene function                         |
|---------------------|-------|---------------------------------------|
| Negative            | GAL10 | GALactose metabolism                  |
| Negative            | GID7  | Glucose-induced degradation deficient |
| Negative            | HXT5  | HeXose Transporter                    |
| Negative            | STL1  | Sugar transporter-like protein        |
| Negative            | PCL6  | Pho85 cyclin                          |

Adapted from Costanzo et al. (2016).

that deletion of MFA2 resulted in a culture with significantly increased (34%) sugar catabolism compared to the parent, we chose to also examine MFA1, a functionally redundant gene encoding a-factor. As the *mfa1*Δ deletant was absent in the deletion collection used in this work, the MFA1 deletant (*mfa1*Δ::KanMX) was constructed in the same background as *mfa2*Δ, AWRI1631, to determine whether an *mfa1*Δ exhibited a similar fermentation phenotype. In fact, *mfa1*Δ deletant performed no differently to the wildtype in terms of fermentation and growth (Fig. 5), suggesting potentially different roles for the MFA1 and MFA2 gene products.

In the wildtype background, transcription of MFA2 was dominant to that of MFA1 (Fig. 6A and B). However, when MFA2 was deleted, MFA1 produced a pattern of expression through fermentation that implied a compensation for the MFA2 gene product in *mfa2*Δ. Contrasting with these results, others have shown MFA1 and MFA2 to be transcribed at similar levels and to be functionally equivalent. Thus, deletion of one of the mating factor genes did not prevent the strain being mating proficient (Michaelis and Herskowitz 1988; Chen et al. 1997). However, here we show that these genes are not functionally equivalent, at least in terms of their impact on fermentation performance. Further work is needed to determine the basis for the link between these genes and fermentation, the extent to which they are functionally equivalent in mating type functions, interactions with related genes and the basis for their differential expression.

Novel interactions between genes have been identified when unexpected phenotypes result from mutations in two or more genes (Dixon et al. 2009; Costanzo et al. 2010). Nevertheless, gene interaction networks (adapted from Costanzo et al. 2016 and the

Saccharomyces Genome Database) already indicate that MFA1 and MFA2 genes interact with different sets of genes, including genes involved in either carbohydrate metabolism, transport or storage (Table 4). Future studies should examine these genes for their potential role in fermentation efficiency in an *mfa2*Δ strain.

## CONCLUSION

Nitrogen-efficient strains offer a means for avoiding or reducing the problems associated with the fermentation of grape juices low in N, but the basis for these efficiency differences is not known. Motivated by this and recognising the fact that wine and laboratory yeast strains can behave differently under wine-like conditions, we generated and exploited a partial wine yeast deletion collection to identify genes whose deletion improved fermentation performance in low-N media. Fifteen deletants were identified through a robust three-stage screening process. The unexpected link between one of these gene deletions, *mfa2*Δ, and fermentation remains to be explored at a more fundamental level. Further candidates would likely be found with completion and screening of the library with all non-essential genes, with all showing promise as the basis for construction of optimised strains for industry use, perhaps by genome editing (Bao et al. 2014). Their use would avoid the need for YAN supplementation or at least reduce the incidence of problem fermentations in unsupplemented juices.

## SUPPLEMENTARY DATA

Supplementary data are available at FEMSYR online.

## Acknowledgement

The authors thank Dr Krista Sumbly and Dr Joanna Sundstrom for technical assistance with library screening.

## FUNDING

This project is supported by funding from Wine Australia (GWR Ph1313 and UA1302). Wine Australia invests in and manages research, development and extension on behalf of Australia's grape growers and winemakers and the Australian Government.

**Conflict of interest.** None declared.

## REFERENCES

- Abe F, Minegishi H. Global screening of genes essential for growth in high-pressure and cold environments: searching for basic adaptive strategies using a yeast deletion library. *Genetics* 2008;**178**:851–72.
- Alexandre H, Charpentier A. Biochemical aspects of stuck and sluggish fermentation in grape must. *J Ind Microbiol Biotechnol* 1998;**20**:20–7.
- Backhus LE, DeRisi J, Brown PO et al. Functional genomic analysis of a commercial wine strain of *Saccharomyces cerevisiae* under differing nitrogen conditions. *FEMS Yeast Res* 2001;**1**:111–25.
- Barbosa C, García-Martínez J, Pérez-Ortín JE et al. Comparative transcriptomic analysis reveals similarities and dissimilarities in *Saccharomyces cerevisiae* wine strains response to nitrogen availability. *PLoS One* 2015;**10**:e0122709.
- Bao Z, Xiao H, Liang J et al. Homology-Integrated CRISPR-Cas (HI-CRISPR) system for one-step multigene disruption in *Saccharomyces cerevisiae*. *ACS Synth Biol* 2015;**4**:585–94.
- Baudin A, Ozier-Kalogeropoulos O, Denouel A et al. A simple and efficient method for direct gene deletion in *Saccharomyces cerevisiae*. *Nucleic Acids Res* 1993;**21**:3329–30.
- Bell AA, Ough CS, Kliewer WM. Effects on must and wine composition, rates of fermentation, and fine quality of nitrogen fertilization of *Vitis vinifera* Var. Thompson Seedless Grapevines. *Am J Enol Viticult* 1979;**30**:124–9.
- Bell S-J, Henschke PA. Implications of nitrogen nutrition for grapes, fermentation and wine. *Aust J Grape Wine Res* 2005;**11**:242–95.
- Bely M, Sablayrolles J, Barre P. Automatic detection of assimilable nitrogen deficiencies during alcoholic fermentation in oenological conditions. *J Ferment Bioeng* 1990;**70**:246–52.
- Bisson LF. Stuck and sluggish fermentations. *Am J Enol Viticult* 1999;**50**:107–19.
- Boehringer-Mannheim. D-glucose/D-fructose. In: *Methods of Biochemical Analysis and Food Analysis*. 1989, 50–5.
- Borneman AR, Forgan AH, Pretorius IS et al. Comparative genome analysis of a *Saccharomyces cerevisiae* wine strain. *FEMS Yeast Res* 2008;**8**:1185–95.
- Brice C, Sanchez I, Bigey F et al. A genetic approach of wine yeast fermentation capacity in nitrogen-starvation reveals the key role of nitrogen signaling. *BMC Genomics* 2014;**15**:495.
- Brice C, Sanchez I, Tesniere C et al. Assessing the mechanisms responsible for differences between nitrogen requirements of *Saccharomyces cerevisiae* wine yeasts in alcoholic fermentation. *Appl Environ Microb* 2014;**80**:1330–9.
- Bustin SA, Beaulieu J-F, Huggett J et al. MIQE précis: practical implementation of minimum standard guidelines for fluorescence-based quantitative real-time PCR experiments. *BMC Mol Biol* 2010;**11**:74.
- Chen P, Sapperstein SK, Choi JD et al. Biogenesis of the *Saccharomyces cerevisiae* mating pheromone  $\alpha$ -Factor. *J Cell Biol* 1997;**136**:251–69.
- Contreras A, Garcia V, Salinas F et al. Identification of genes related to nitrogen uptake in wine strains of *Saccharomyces cerevisiae*. *World J Microbiol Biotechnol* 2012;**28**:1107–13.
- Costanzo M, Baryshnikova A, Bellay J et al. The genetic landscape of a cell. *Science* 2010;**327**:425–31.
- Costanzo M, VanderSluis B, Koch EN et al. A global genetic interaction network maps a wiring diagram of cellular function. *Science* 2016;**353**:aaf1420.
- Delneri D, Hoyle DC, Gkargkas K et al. Identification and characterization of high-flux-control genes of yeast through competition analyses in continuous cultures. *Nat Genet* 2008;**40**:113–7.
- Dixon SJ, Costanzo M, Baryshnikova A et al. Systematic mapping of genetic interaction networks. *Annu Rev Genet* 2009;**43**:601–25.
- Donalies UB, Nguyen HT, Stahl U et al. Improvement of *Saccharomyces* yeast strains used in brewing, wine making and baking. *Food Biotechnol* 2008;**111**:67–98.
- Fujita K, Matsuyama A, Kobayashi Y et al. The genome-wide screening of yeast deletion mutants to identify the genes required for tolerance to ethanol and other alcohols. *FEMS Yeast Res* 2006;**6**:744–50.
- Galgoczy DJ, Cassidy-Stone A, Llinás M et al. Genomic dissection of the cell-type-specification circuit in *Saccharomyces cerevisiae*. *P Natl Acad Sci* 2004;**101**:18069–74.
- Gardner JM, McBryde C, Vystavelova A et al. Identification of genes affecting glucose catabolism in nitrogen-limited fermentation. *FEMS Yeast Res* 2005;**5**:791–800.
- Gardner JM, Poole K, Jiranek V. Practical significance of relative assimilable nitrogen requirements of yeast: a preliminary study of fermentation performance and liberation of H<sub>2</sub>S. *Aust J Grape Wine Res* 2002;**8**:175–9.
- Giaever G, Chu AM, Ni L et al. Functional profiling of the *Saccharomyces cerevisiae* genome. *Nature* 2002;**418**:387–91.
- Gietz RD, Schiestl RH. Large-scale high-efficiency yeast transformation using the LiAc/SS carrier DNA/PEG method. *Nat Protoc* 2007;**2**:38–41.
- Guthrie C, Fink GR. Guide to yeast genetics and molecular and cell biology. In: Guthrie C, Fink GR (eds) *Methods in Enzymology*, vol. 351. Academic Press, New York, USA 2002, 3–735.
- Gutiérrez A, Beltran G, Warringer J et al. Genetic basis of variations in nitrogen source utilization in four wine commercial yeast strains. *PLoS One* 2013;**8**:e67166.
- Gutierrez A, Chiva R, Sancho M et al. Nitrogen requirements of commercial wine yeast strains during fermentation of a synthetic grape must. *Food Microbiol* 2012;**31**:25–32.
- Henschke PA, Jiranek V. Yeasts: metabolism of nitrogen compounds. In: Fleet, GH (ed). *Wine Microbiology and Biotechnology*. Switzerland: Harwood Academic Publishers, 1993, 77–164.
- Hershko A. Roles of ubiquitin-mediated proteolysis in cell cycle control. *Curr Opin Cell Biol* 1997;**9**:788–99.
- Hicke L. A new ticket for entry into budding vesicles - Ubiquitin. *Cell* 2001;**106**:527–30.
- Jiranek V, Langridge P, Henschke PA. Amino acid and ammonium utilization by *Saccharomyces cerevisiae* wine yeasts from a chemically defined medium. *Am J Enol Viticult* 1995a;**46**:75–83.
- Jiranek V, Langridge P, Henschke PA. Regulation of hydrogen sulfide liberation in wine-producing *Saccharomyces cerevisiae* strains by assimilable nitrogen. *Appl Environ Microb* 1995b;**61**:461–7.
- Johnson AD. Molecular mechanisms of cell-type determination in budding yeast. *Curr Opin Genet Dev* 1995;**5**:552–8.
- Leon S, Erpapazoglou Z, Haguenuer-Tsapis R. Ear1p and Ssh4p are new adaptors of the ubiquitin ligase Rsp5p for cargo ubiquitylation and sorting at multivesicular bodies. *Mol Biol Cell* 2008;**19**:2379–88.
- Liccioli T, Chambers PJ, Jiranek V. A novel methodology independent of fermentation rate for assessment of the fructophilic character of wine yeast strains. *J Ind Microbiol Biotechnol* 2011a;**38**:833–43.
- Liccioli T, Tran TM, Cozzolino D et al. Microvinification-how small can we go?? *Appl Microbiol Biotechnol* 2011b;**89**:1621–8.
- Manginot C, Roustan JL, Sablayrolles JM. Nitrogen demand of different yeast strains during alcoholic fermentation. Importance of the stationary phase. *Enzyme Microb Technol* 1998;**23**:511–7.

- McBryde C, Gardner JM, de Barros Lopes M et al. Generation of novel wine yeast strains by adaptive evolution. *Am J Enol Viticult* 2006;**57**:423–30.
- McClellan CJ, Does AL, Bisson LF. Characterization of hexose uptake in wine strains of *Saccharomyces cerevisiae* and *Saccharomyces bayanus*. *Am J Enol Viticult* 1989;**40**:9–15.
- McMahon KW, Manukyan A, Dungrawala H et al. FASTA barcodes: a simple method for the identification of yeast ORF deletions. *Yeast* 2011;**28**:661–71.
- Mendes-Ferreira A, del Olmo M, García-Martínez J et al. Transcriptional response of *Saccharomyces cerevisiae* to different nitrogen concentrations during alcoholic fermentation. *Appl Environ Microb* 2007a;**73**:3049–60.
- Mendes-Ferreira A, del Olmo M, Garcia-Matinez J et al. *Saccharomyces cerevisiae* signature genes for predicting nitrogen deficiency during alcoholic fermentation. *Appl Environ Microb* 2007b;**73**:5363–9.
- Michaelis S, Barrowman J. Biogenesis of the *Saccharomyces cerevisiae* pheromone a-factor, from yeast mating to human disease. *Microbiol Mol Biol Rev* 2012;**76**:626–51.
- Michaelis S, Herskowitz I. The a-factor pheromone of *Saccharomyces cerevisiae* is essential for mating. *Mol Cell Biol* 1988;**8**:1309–18.
- Mira N, Palma M, Guerreiro J et al. Genome-wide identification of *Saccharomyces cerevisiae* genes required for tolerance to acetic acid. *Microb Cell Fact* 2010;**9**:1–13.
- Muller M, Capuano F, Pir P et al. A prototrophic deletion mutant collection for yeast metabolomics and systems biology. *Nat Biotechnol* 2012;**30**:1176–8.
- Nikko E, Marini AM, Andre B. Permease recycling and ubiquitination status reveal a particular role for Bro1 in the multivesicular body pathway. *J Biol Chem* 2003;**278**:50732–43.
- Oestreich AJ, Davies BA, Payne JA et al. Mvb12 is a novel member of ESCRT-I involved in cargo selection by the multivesicular body pathway. *Mol Biol Cell* 2007;**18**:646–57.
- Pronk JT. Auxotrophic yeast strains in fundamental and applied research. *Appl Environ Microb* 2002;**68**:2095–100.
- Reiner S, Micolod D, Zellnig G et al. A genomewide screen reveals a role of mitochondria in anaerobic uptake of sterols in yeast. *Mol Biol Cell* 2006;**17**:90–103.
- Rosignol T, Dulau L, Julien A et al. Genome-wide monitoring of wine yeast gene expression during alcoholic fermentation. *Yeast* 2003;**20**:1369–85.
- Sablayrolles J-M, Dubois C, Manginot C et al. Effectiveness of combined ammoniacal nitrogen and oxygen additions for completion of sluggish and stuck wine fermentations. *J Ferment Bioeng* 1996;**82**:377–81.
- Salvadó Z, Ramos-Alonso L, Tronchoni J et al. Genome-wide identification of genes involved in growth and fermentation activity at low temperature in *Saccharomyces cerevisiae*. *Int J Food Microbiol* 2016;**236**:38–46.
- Schmittgen TD, Livak KJ. Analyzing real-time PCR data by the comparative CT method. *Nat Protoc* 2008;**3**:1101–8.
- Staub O, Rotin D. Role of ubiquitylation in cellular membrane transport. *Physiol Rev* 2006;**86**:669–707.
- Taylor SC, Mrkusich EM. The state of RT-quantitative PCR: first-hand observations of implementation of minimum information for the publication of quantitative real-time PCR experiments (MIQE). *J Mol Microbiol Biotechnol* 2014;**24**:46–52.
- Teixeira MC, Raposo LR, Mira NP et al. Genome-wide identification of *Saccharomyces cerevisiae* genes required for maximal tolerance to ethanol. *Appl Environ Microb* 2009;**75**:5761–72.
- Teixeira MC, Raposo LR, Palma M et al. Identification of genes required for maximal tolerance to high-glucose concentrations, as those present in industrial alcoholic fermentation media, through a chemogenomics approach. *OMICS* 2010;**14**:201–10.
- Tesnière C, Brice C, Blondin B. Responses of *Saccharomyces cerevisiae* to nitrogen starvation in wine alcoholic fermentation. *Appl Microbiol Biotechnol* 2015;**99**:7025–34.
- Teste M-A, Duquenne M, François JM et al. Validation of reference genes for quantitative expression analysis by real-time RT-PCR in *Saccharomyces cerevisiae*. *BMC Mol Biol* 2009;**10**:1–15.
- Torrea D, Varela C, Ugliano M et al. Comparison of inorganic and organic nitrogen supplementation of grape juice – effect on volatile composition and aroma profile of a Chardonnay wine fermented with *Saccharomyces cerevisiae* yeast. *Food Chem* 2011;**127**:1072–83.
- Tucker CL, Fields S. Quantitative genome-wide analysis of yeast deletion strain sensitivities to oxidative and chemical stress. *Comp Funct Genomics* 2004;**5**:216–24.
- Ugliano M, Fedrizzi B, Siebert T et al. Effect of nitrogen supplementation and *Saccharomyces* species on hydrogen sulfide and other volatile sulfur compounds in shiraz fermentation and wine. *J Agric Food Chem* 2009;**57**:4948–55.
- Ugliano M, Henschke PA, Herderich MJ et al. Nitrogen management is critical for wine flavour and style. *Wine Ind J* 2007;**22**:24–30.
- van Voorst F, Houghton-Larsen J, Jønson L et al. Genome-wide identification of genes required for growth of *Saccharomyces cerevisiae* under ethanol stress. *Yeast* 2006;**23**:351–9.
- Vandesompele J, De Preter K, Pattyn F et al. Accurate normalization of real-time quantitative RT-PCR data by geometric averaging of multiple internal control genes. *Genome Biol* 2002;**3**:0034.
- Varela C, Kutyna DR, Solomon MR et al. Evaluation of gene modification strategies for the development of low-alcohol-wine yeasts. *Appl Environ Microb* 2012;**78**:6068–77.
- Varela C, Pizarro F, Agosin E. Biomass content governs fermentation rate in nitrogen-deficient wine musts. *Appl Environ Microb* 2004;**70**:3392–400.
- Vilanova M, Ugliano M, Varela C et al. Assimilable nitrogen utilisation and production of volatile and non-volatile compounds in chemically defined medium by *Saccharomyces cerevisiae* wine yeasts. *Appl Microbiol Biotechnol* 2007;**77**:145–57.
- Wach A, Brachat A, Pöhlmann R et al. New heterologous modules for classical or PCR-based gene disruptions in *Saccharomyces cerevisiae*. *Yeast* 1994;**10**:1793–808.
- Walker M, Gardner J, Vystavelova A et al. Application of the reuseable, selectable marker to industrial yeast: construction and evaluation of heterothallic wine strains of , possessing minimal foreign DNA sequences. *FEMS Yeast Res* 2003;**4**:339–47.
- Walker M, Nguyen T, Liccioli T et al. Genome-wide identification of the Fermentome; genes required for successful and timely completion of wine-like fermentation by *Saccharomyces cerevisiae*. *BMC Genomics* 2014;**15**:552.
- Winzeler EA, Shoemaker DD, Astromoff A et al. Functional Characterization of the *S. cerevisiae* genome by gene deletion and parallel analysis. *Science* 1999;**285**:901–6.
- Wu H, Watanabe T, Araki Y et al. Disruption of ubiquitin-related genes in laboratory yeast strains enhances ethanol production during sake brewing. *J Biosci Bioeng* 2009;**107**:636–40.
- Zhang J, Astorga MA, Gardner JM et al. Disruption of the cell wall integrity gene ECM33 results in improved fermentation by wine yeast. *Metab Eng* 2018;**45**:255–264. doi: 10.1016/j.ymben.2017.12.012.
